# Supplementary material for: A microprocessor based on a two-dimensional semiconductor
Source: PubMed Central journal article supplement (PMC5394242; doi:10.1038/ncomms14948), 2017-04-11
Supplement: ncomms14948-s1.pdf [file ncomms14948-s1.pdf]

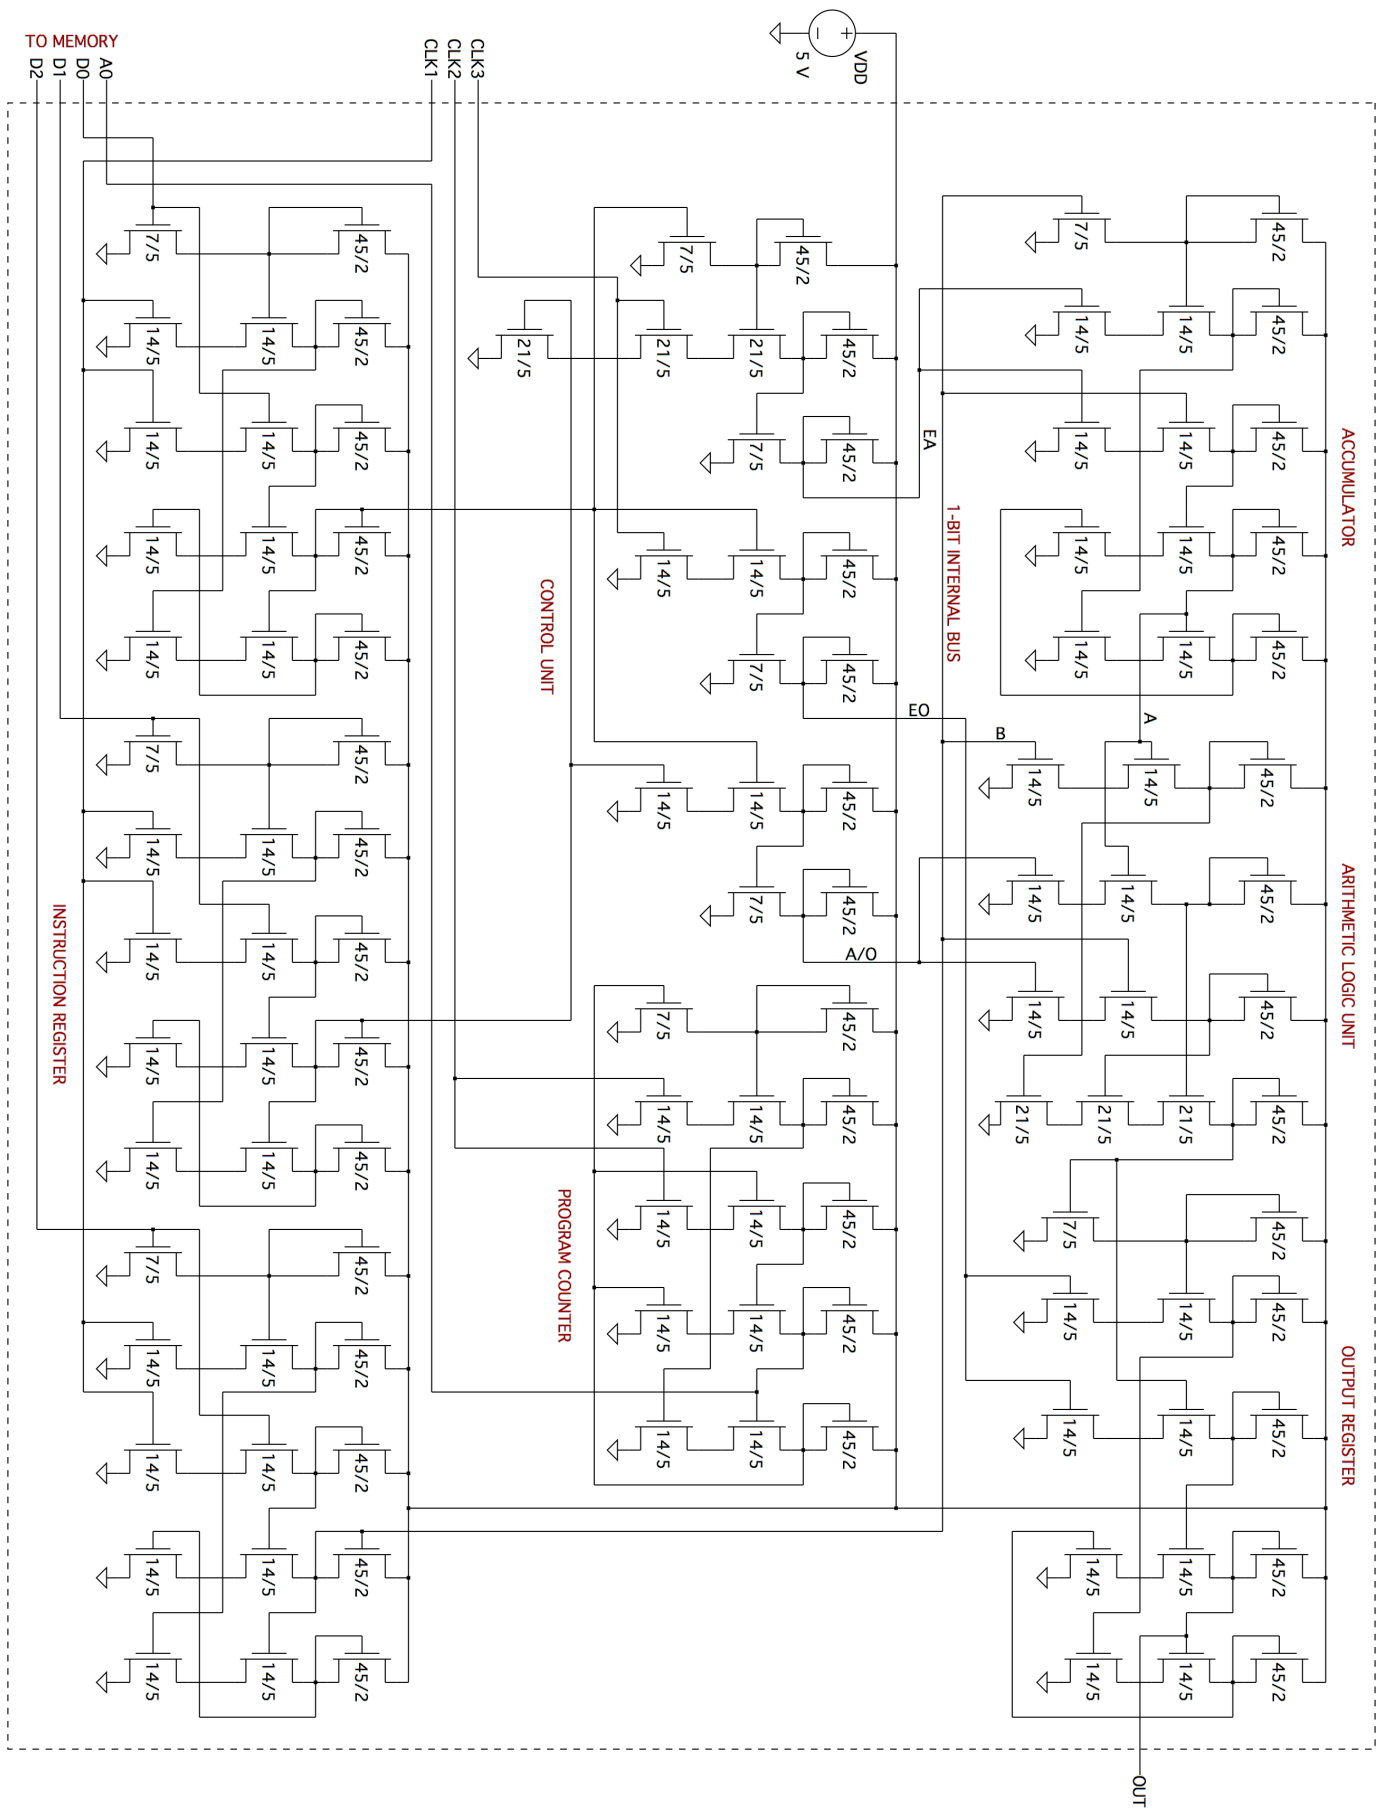

Supplementary Figure 1 | Circuit schematic of the microprocessor.

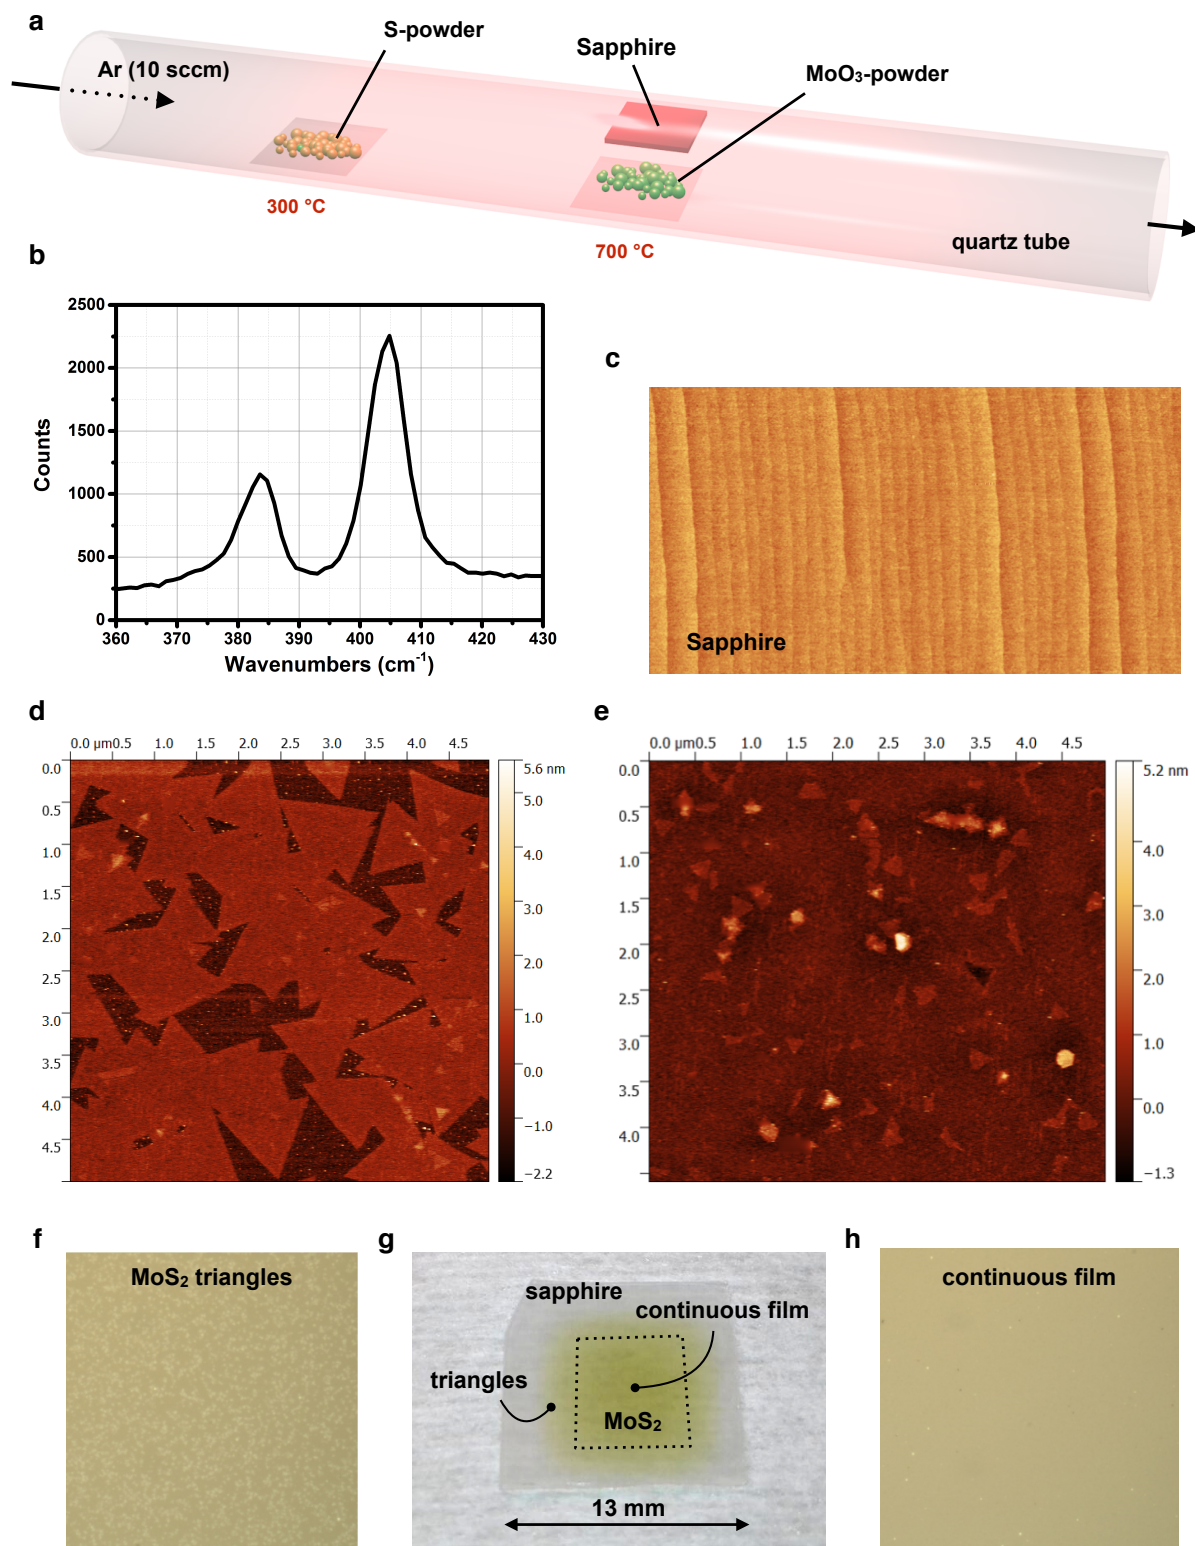

**Supplementary Figure 2 | MoS<sub>2</sub> film growth.** (a) Schematic illustration of the growth setup. (b) Raman measurements, taken in the center of the sample, reveal that the MoS<sub>2</sub> film is a bilayer ( $E_{2g} - A_{1g}$  spacing: 21.2 cm<sup>-1</sup>). (c) AFM image of sapphire growth substrate. (d) The AFM image taken close to the edges of the sample shows triangular MoS<sub>2</sub> monolayer growth. (e) Towards the center of the sample, the triangles coalesce and form a continuous, polycrystalline film. (f) Microscope image of MoS<sub>2</sub> triangles. (g) Photograph of the MoS<sub>2</sub> layer grown on a sapphire. (h) Microscope image of continuous MoS<sub>2</sub> film.

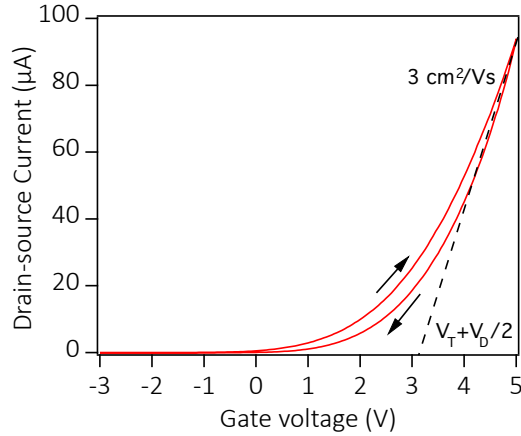

**Supplementary Figure 3 | Transistor transfer characteristic.** Field-effect mobility ( $\mu \approx 3 \text{ cm}^2 \text{ V}^{-1} \text{ s}^{-1}$ ), hysteresis, and threshold voltage ( $V_T \approx 0.65 \text{ V}$ ) of MoS<sub>2</sub> FET.  $V_D = 5 \text{ V}$ .

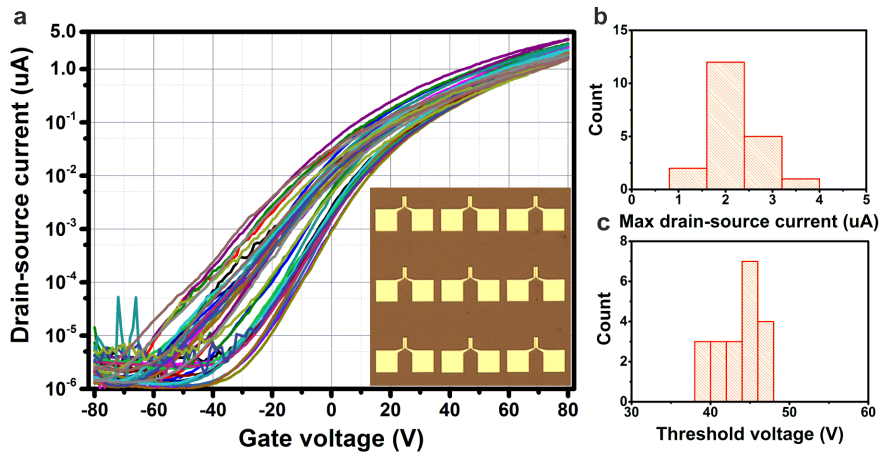

**Supplementary Figure 4 | MoS<sub>2</sub> film uniformity.** To study the uniformity of our CVD-grown MoS<sub>2</sub> films, we fabricated an array of back-gated transistors over a  $\sim 3 \times 3 \text{ mm}^2$  area on a Si/SiO<sub>2</sub> (300 nm) test wafer. (a) Transfer characteristics (scanned forth and back) of 20 devices (inset: microscope image, showing 9 devices). Histograms of (b) maximum drain-source current and (c) threshold voltage show good uniformity.

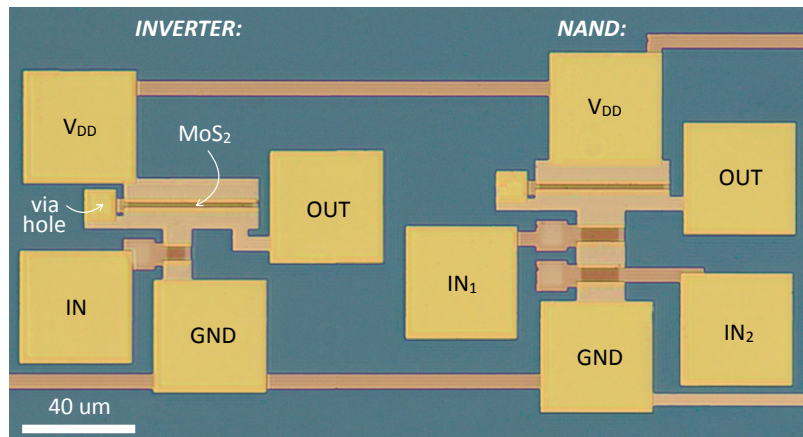

**Supplementary Figure 5 | Inverter and NAND logic stages.** Micrographs of inverter (left) and NAND (right) test structures.

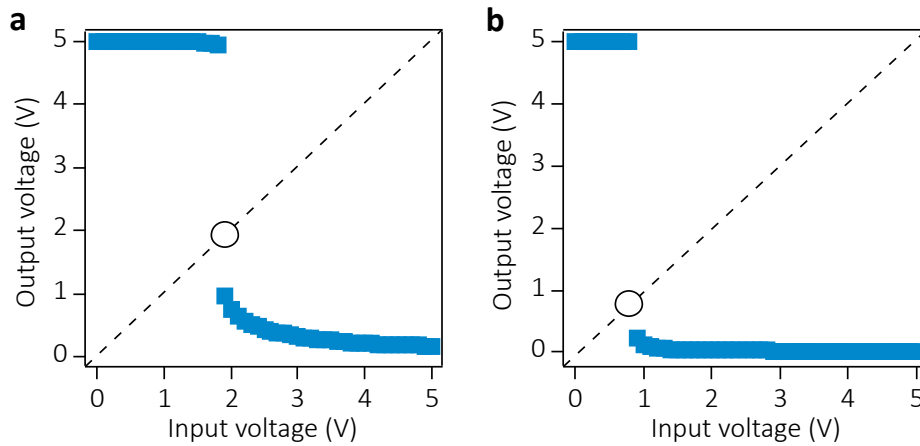

**Supplementary Figure 6 | Calculated inverter input-output characteristic.** (a) Results for the asymmetric transistor design presented in the manuscript (Figure 2a). (b) If both transistors are implemented with same  $W/L$ -ratio, the switching threshold drops below 1 V. The circles show the switching threshold voltages  $V_M$ .

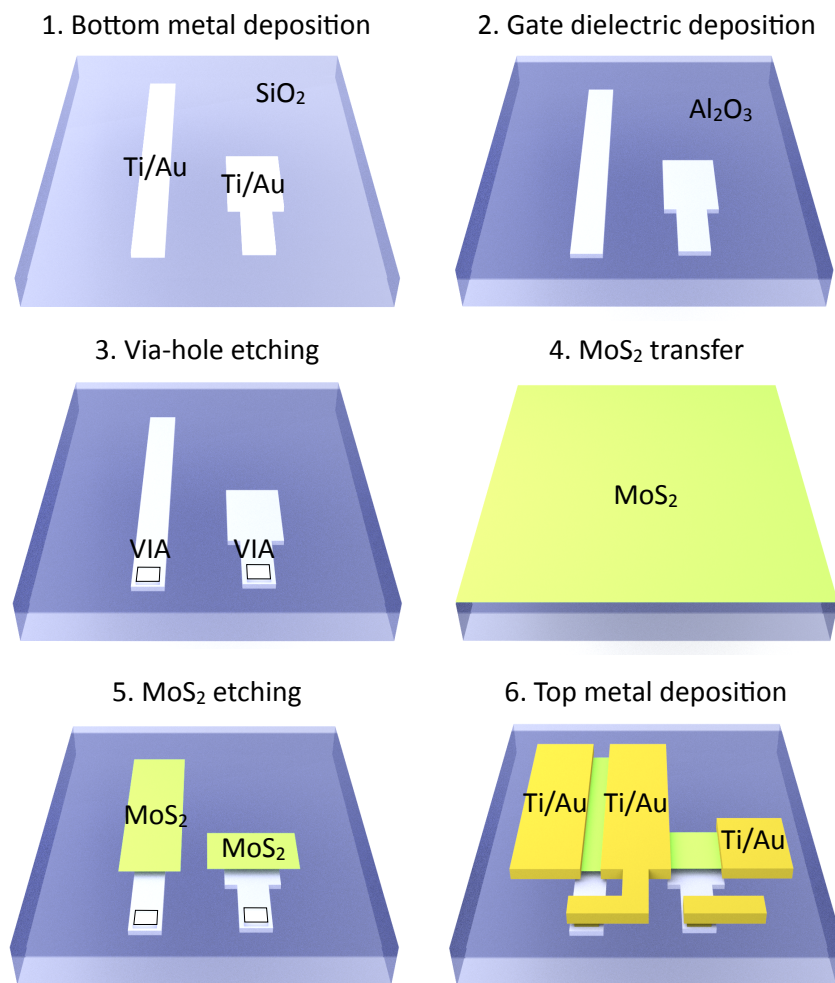

**Supplementary Figure 7 | Device fabrication process flow.**



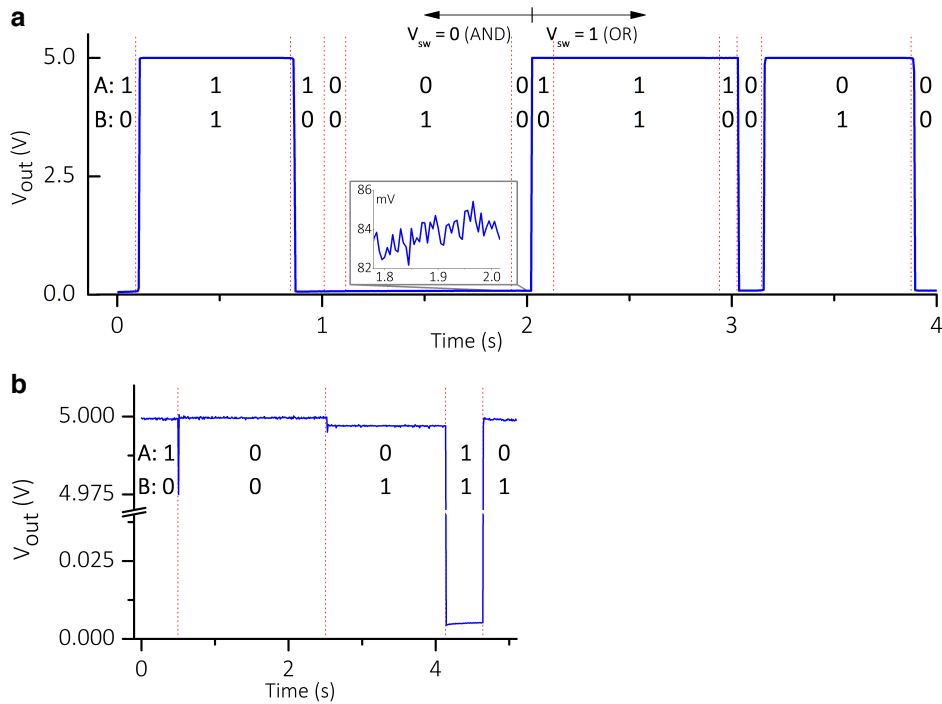

**Supplementary Figure 8 | ALU and NAND output voltage levels.** (a) Time-domain measurements of ALU output voltage  $V_{OUT}$  for different A, B, and A/O input logic states (0,  $V_{IN} = 0$  V; 1,  $V_{IN} = 5$  V). (b) Same measurement for a NAND.

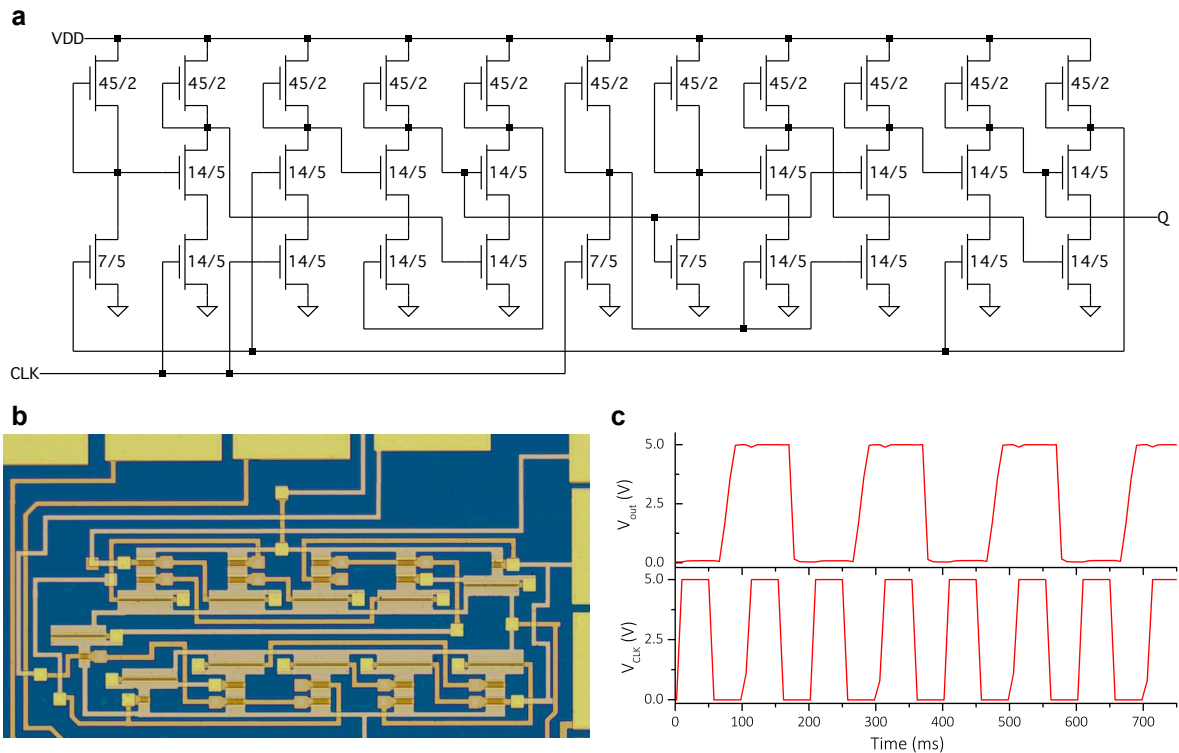

**Supplementary Figure 9 | Improved program counter.** Program counter based on a master/slave flip-flop. (a) Circuit schematic, (b) microscope image, (c) device operation at  $1/T_{CLK} = 10$  Hz (bottom curve: input CLK signal, upper curve: output signal).

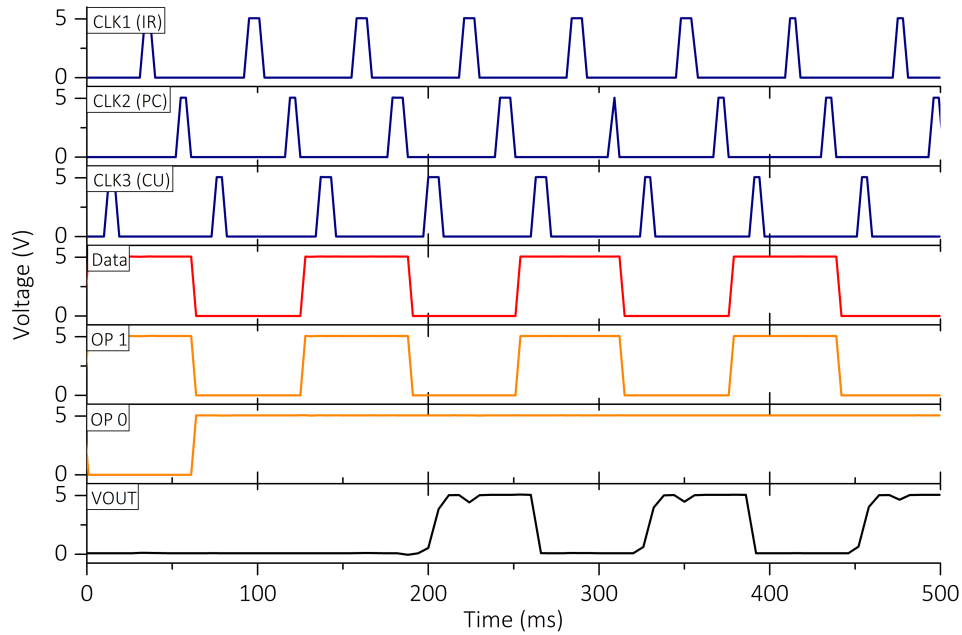

**Supplementary Figure 10 | Microprocessor waveforms.** Operation of the microprocessor at  $1/T_{\text{CLK}} = 50$  Hz (limit of our measurement setup).

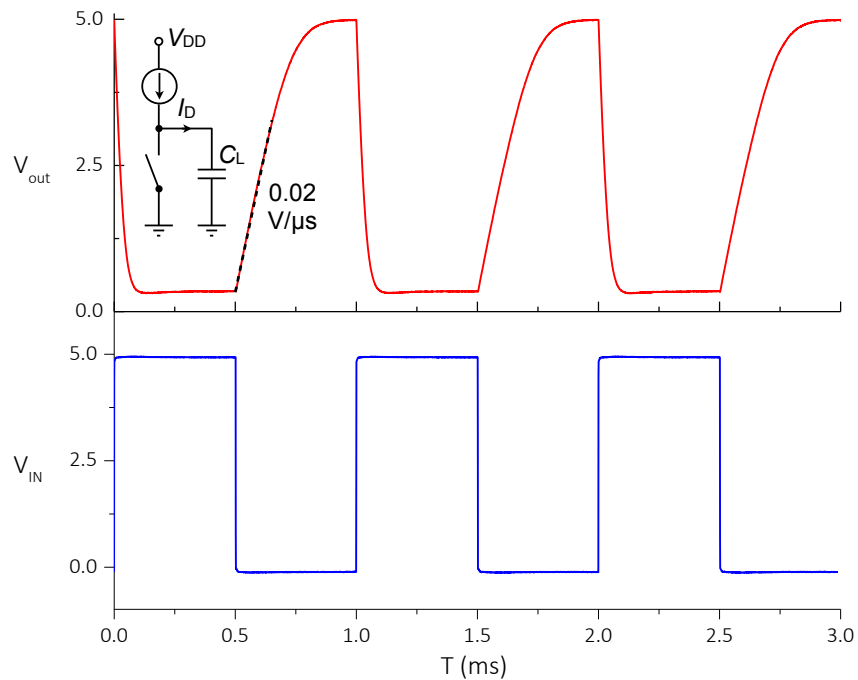

**Supplementary Figure 11 | Temporal characterization of inverter.** In order to determine the ultimate speed limit of our NMOS logic stages, we investigated the temporal response of an inverter with external capacitive load of  $C_L = 30$  pF. It is limited by the current-driving capability of the load transistor, which is operated in the sub-threshold regime with  $I_D \approx 0.55 \mu\text{A}$  (see inset). From the measurement we determine  $\Delta V_{\text{out}}/\Delta t \approx 0.02 \text{ V}/\mu\text{s}$ , in good agreement with the theoretically expected value of  $\Delta V_{\text{out}}/\Delta t = I_D/C_L \approx 0.018 \text{ V}/\mu\text{s}$ . If the capacitive load is reduced to  $C_L \approx 1\text{--}10$  pF, we can thus expect a maximum operation frequency of  $f_{\text{MAX}} \approx 2\text{--}20$  kHz.

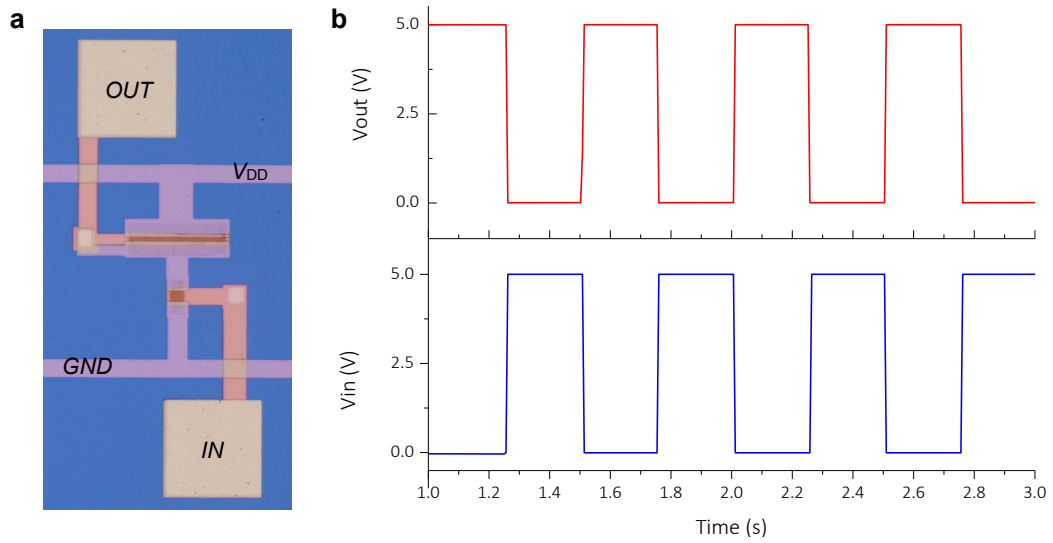

**Supplementary Figure 12 | Optical lithography.** Although our microprocessor was fabricated with electron beam lithography, we also developed a technology for the fabrication of logic stages with standard optical lithography. A microscope image of a so obtained inverter and corresponding waveforms are shown in (a) and (b) respectively. The process flow is similar to that described in the Methods section, apart from via-hole etching which was done by MIF developer instead of KOH.
